# Supplementary material for: Effect of method of deduplication on estimation of differential gene expression using RNA-seq
Source: PeerJ. 2017 Mar 16;5:e3091. doi: 10.7717/peerj.3091 (PMC5357343; doi:10.7717/peerj.3091)
Supplement: Table S4 [file peerj-05-3091-s004.xlsx]

## Sheet: qRT-PCR verification
Fold changes obtained by RNA-seq and qRT-PCR
Gene Name	RNA-seq based FC	Real-time PCR based FC		SD of real-time PCR based FC
		Replicate 1	Replicate 2	Replicate 1	Replicate 2
SCD	5.84	5.77431	5.86634	1.70528	0.73766
Glo1	3.96	5.01078	3.21583	1.63657	0.173976
PRKAR1A	3.63	4.55678	5.90278	0.370021	0.840288
List of primers used in qRT-PCR analysis
Primer name	Forward primer	Reverse primer	Tann, °C
TBP	TGCACAGGAGCCAAGAGTGA	ACTTCACATCACAGCTCCCCA	62.8
SCD	GCTGCCCACCTCTTCGGA	GAGGGCGGCCATGCAATCA	63.4
Glo1	GCGGACCCCAGTACCAAGGA	GGAGAGCGCCCAGGCTATTT	63.4
PRKAR1A	GGGCATCGACCGAGACAG	ATCCCCTGGTTCTCCCTGC	63.4
Tann – annealing temperature for each pair of primers was experimentally optimized to minimize the non-specific amplification without reducing PCR efficiency.
